# Supplementary material for: Synthesis and post-polymerization modification of star-shaped poly(ethylene glycol)-block-polydehydroalanine block copolymers: a versatile template for designing multifunctional polymers
Source: Royal Society of Chemistry journal article supplement (doi:10.1039/d3py00622k), 2023-01-01
Supplement: d3py00622k1.pdf [file d3py00622k1.pdf]

# **Synthesis and Post-Polymerization Modification of Star-Shaped Poly(ethylene glycol)-*block*-Poly (dehydroalanine) Block Copolymers: A Versatile Template for Designing Multifunctional Polymers**

Peter J. Mons,<sup>1,2,3</sup> Purushottam Poudel, Marius Hingels, Felix H. Schacher,<sup>1,2,3</sup> \*

<sup>1</sup> Institute of Organic Chemistry and Macromolecular Chemistry (IOMC), Friedrich-Schiller-University Jena, Lessingstraße 8, D-07743 Jena, Germany

<sup>2</sup> Jena Center for Soft Matter (JCSM), Friedrich-Schiller-University Jena, Philosophenweg 7, D-07743 Jena, Germany

<sup>3</sup> Center for Energy and Environmental Chemistry (CEEC), Friedrich-Schiller-University Jena, Philosophenweg 7, D-07743 Jena, Germany

Email: [felix.schacher@uni-jena.de](mailto:felix.schacher@uni-jena.de)

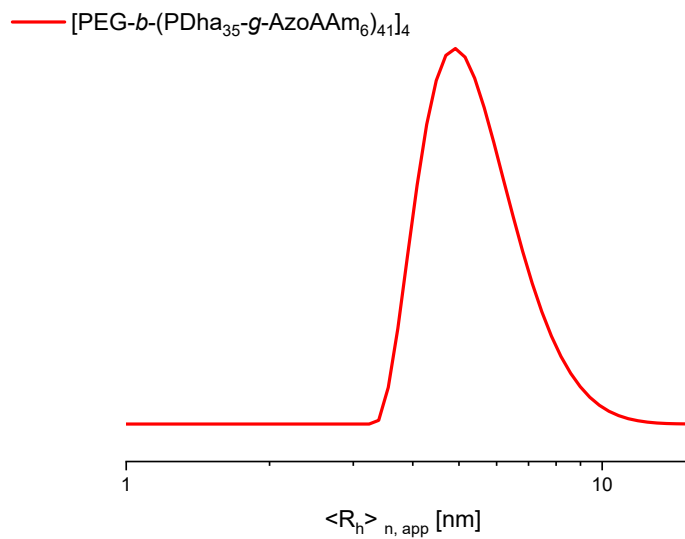

**Figure S1:** Number-weighted DLS CONTIN plot of [PEG<sub>27</sub>-*b*-(PDha<sub>35</sub>-g-AzoAAm<sub>6</sub>)<sub>41</sub>]<sub>4</sub> using 2mg/mL with deionized water as solvent.

**Table S1:** Summary of synthesized [PEG<sub>27</sub>-*b*-(PDha-*g*-X)<sub>41</sub>]<sub>4</sub> graft copolymers and their characterization *via* <sup>1</sup>H-NMR and SEC.

| Modifier                                                                            | Modifier | Eq modifier per PDha | Solvent\ Base | Polymer concentration | DoF [%] <sup>a</sup> | <i>M<sub>n</sub></i> [g/mol]     | [ <i>D</i> ]     |
|-------------------------------------------------------------------------------------|----------|----------------------|---------------|-----------------------|----------------------|----------------------------------|------------------|
|    | PEG-LOM  | 10                   | 3             | 6.25 mg/mL            | 7                    | -                                | -                |
|    | NiPAAm   | 30                   | 1             | 12.5 mg/mL            | 63                   | 8 600 <sup>b</sup>               | 1.8 <sup>b</sup> |
|    | DEA      | 30                   | 1             | 12.5 mg/mL            | 92                   | 7 200 <sup>b</sup>               | 1.7 <sup>b</sup> |
|    | AMPS     | 30                   | 1             | 12.5 mg/mL            | 30                   | 1 * 10 <sup>6</sup> <sup>c</sup> | 3.4 <sup>c</sup> |
|    | AAPBA    | 10                   | 2             | 10 mg/mL              | 17                   | -                                | -                |
|    | AMTC     | 30                   | 1             | 12.5 mg/mL            | 170                  | 9 100 <sup>c</sup>               | 1.6 <sup>c</sup> |
|   | EOcT     | 30                   | 3             | 10 mg/mL              | 74                   | 16 400 <sup>b</sup>              | 1.7 <sup>b</sup> |
|  | AGE      | 15                   | 1             | 12.5 mg/mL            | 99                   | 9 000 <sup>b</sup>               | 1.8 <sup>b</sup> |
|  | BpyOM    | 30                   | 3             | 6.25 mg/mL            | 13                   | 11 700 <sup>b</sup>              | 1.7 <sup>b</sup> |
|  | AzoAAm   | 0.2                  | 3             | 6.25 mg/mL            | 13                   | 10 000 <sup>b</sup>              | 1.7 <sup>b</sup> |

<sup>a</sup>Determined by <sup>1</sup>H-NMR spectroscopy. <sup>b</sup>Determined SEC (eluent: DMSO/LiBr [99.79/0.21], 4-arm star PEG calibration) <sup>c</sup> Determined SEC (eluent: water and 0.3% TFA/ 0.1 M NaCl [pH < 2], polyvinyl pyridine calibration).

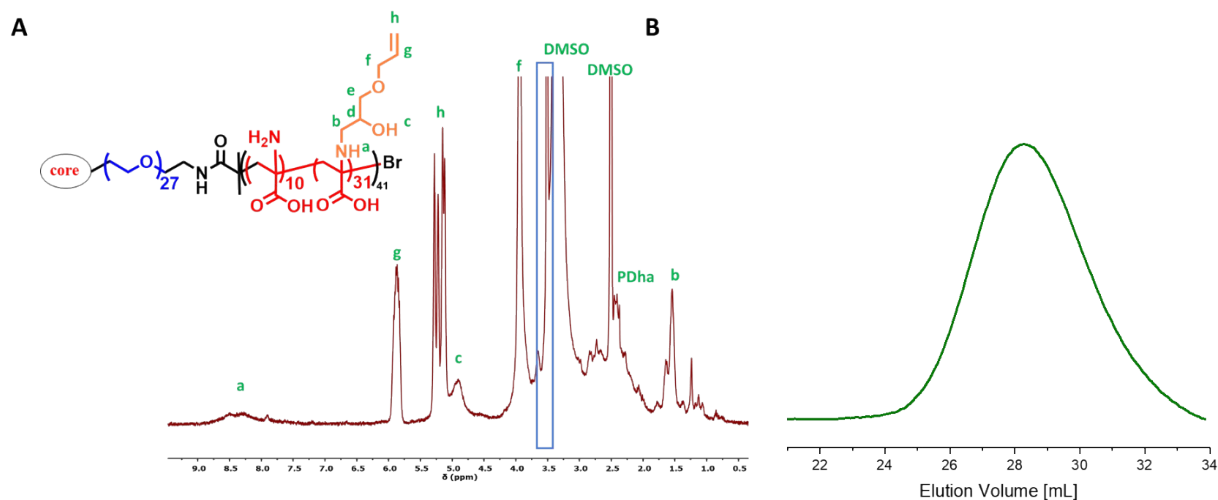

**Figure S2A:** Exemplary  $^1\text{H-NMR}$  spectrum of successful post polymerization reaction of  $[\text{PEG}_{27}\text{-}b\text{-PDha}_{41}]_4$  with AGE as modifier (DMSO) **B:** SEC-traces of post polymerization reaction of  $[\text{PEG}_{27}\text{-}b\text{-PDha}_{41}]_4$  with AGE as modifier (eluent: DMSO\LiCl [99.79/0.21], 4-arm star PEG calibration).

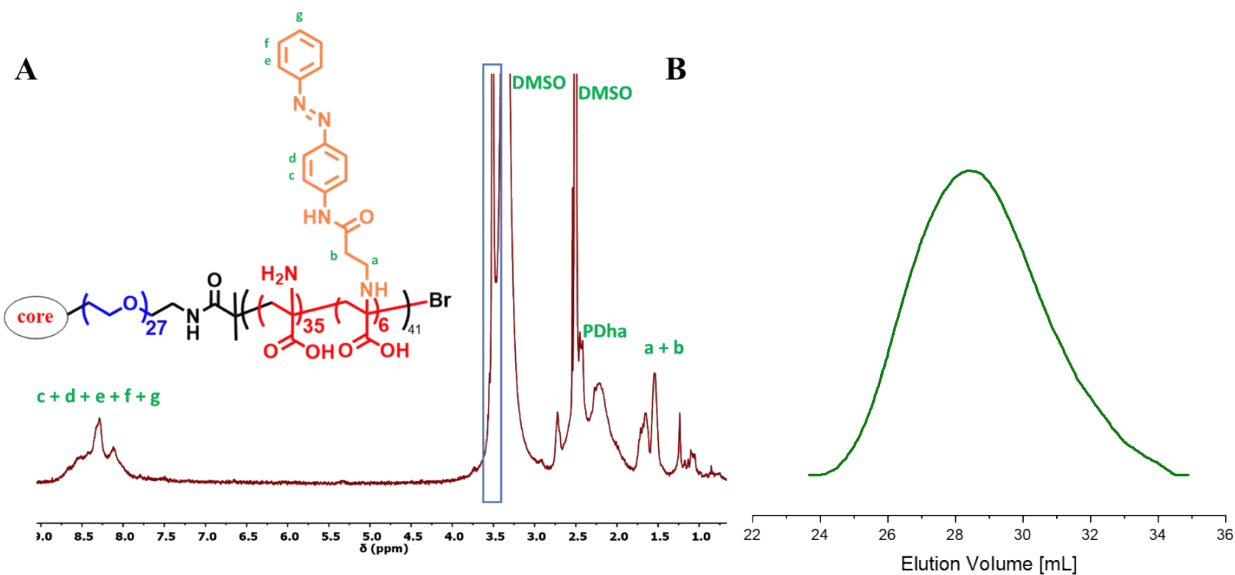

**Figure S3:** A: Exemplary  $^1\text{H-NMR}$  spectrum of successful post polymerization reaction of  $[\text{PEG}_{27}\text{-}b\text{-PDha}_{41}]_4$  with AzoAAM as modifier (DMSO) **B:** SEC-traces of post polymerization reaction of  $[\text{PEG}_{27}\text{-}b\text{-PDha}_{41}]_4$  with AzoAAM as modifier (eluent: DMSO\LiCl [99.79/0.21], 4-arm star PEG calibration).

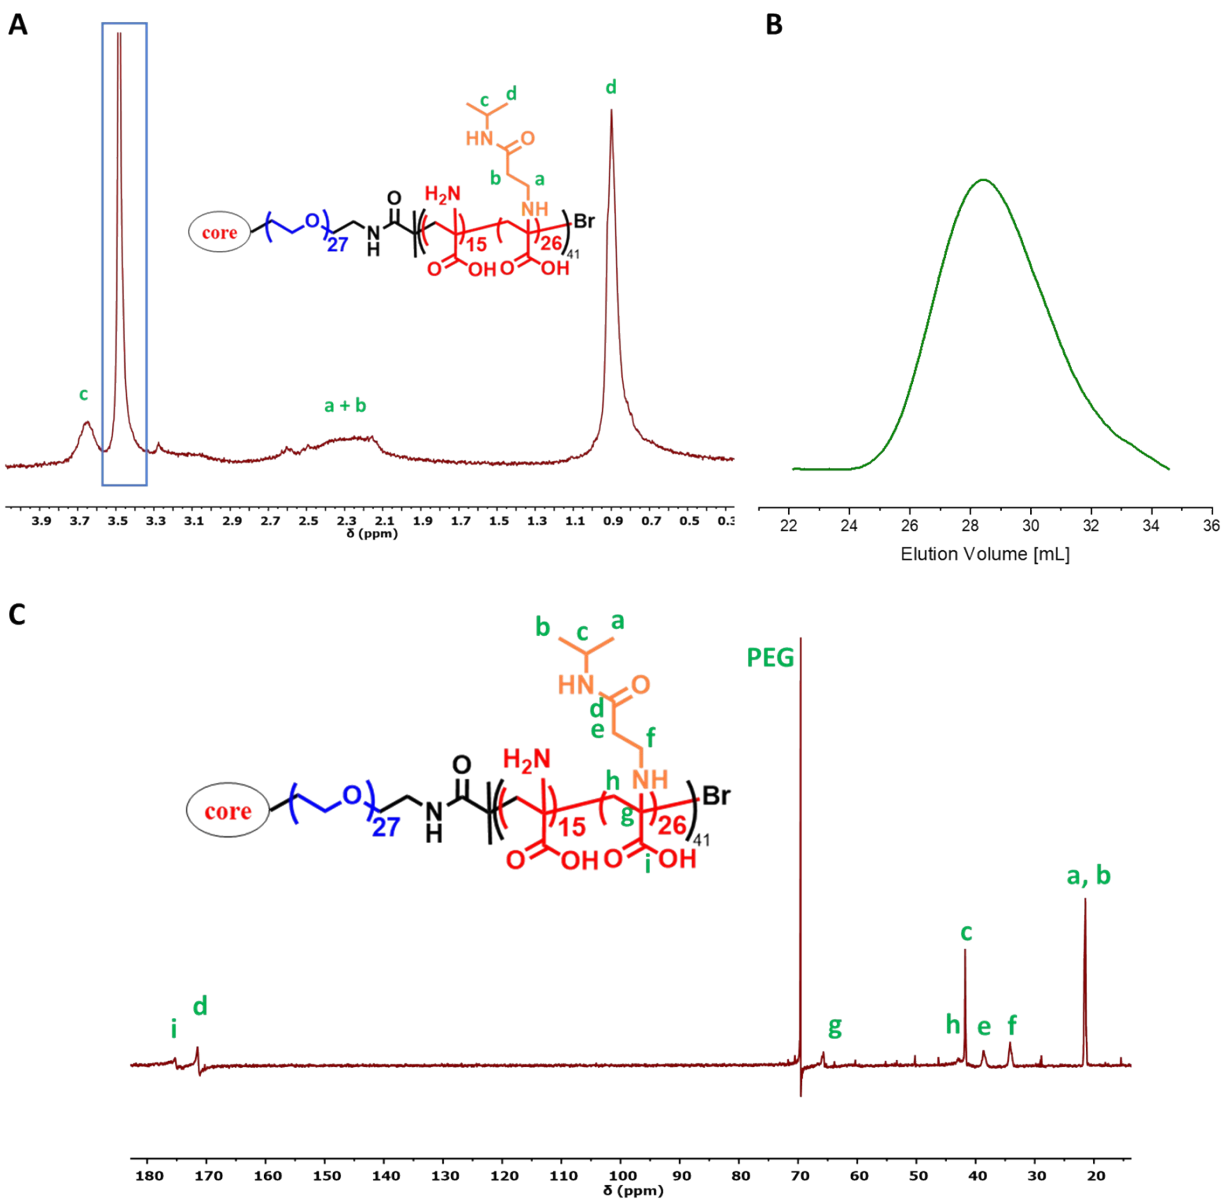

**Figure S4:** Exemplary  $^1\text{H-NMR}$  spectrum of successful post polymerization reaction of  $[\text{PEG}_{27}\text{-}b\text{-PDha}_{41}]_4$  with NiPAAm as modifier ( $\text{D}_2\text{O}$ ) B: SEC-traces of post polymerization reaction of  $[\text{PEG}_{27}\text{-}b\text{-PDha}_{41}]_4$  with NiPAAm as modifier (eluent:  $\text{DMSO}\backslash\text{LiCl}$  [99.79/0.21], 4-arm star PEG calibration) C: Exemplary  $^{13}\text{C-NMR}$  spectrum of successful post polymerization reaction of  $[\text{PEG}_{27}\text{-}b\text{-PDha}_{41}]_4$  with NiPAAm as modifier ( $\text{D}_2\text{O}$ ).

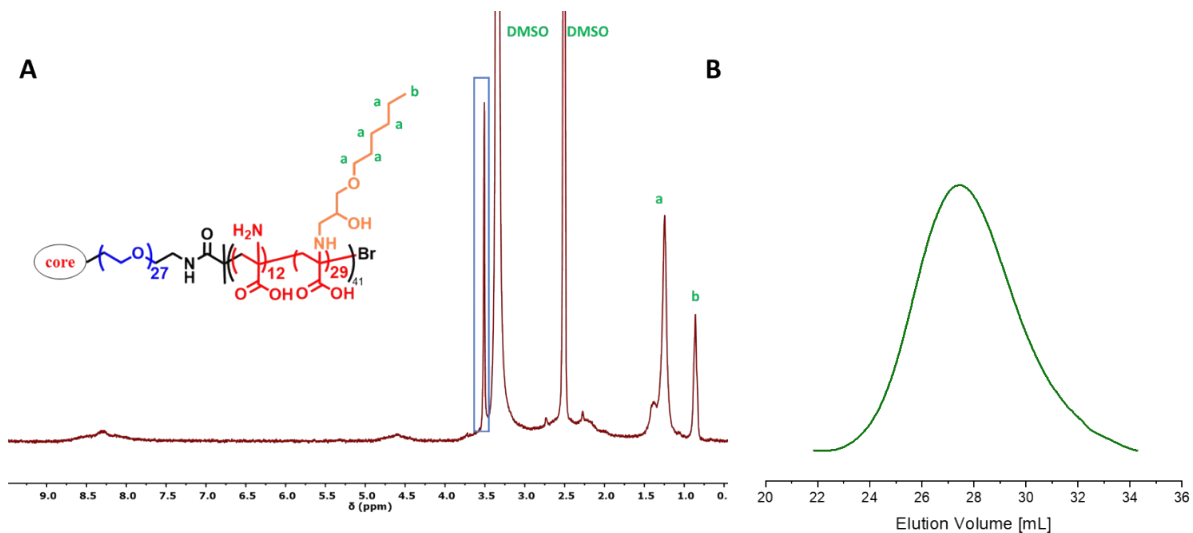

**Figure S5:** Exemplary  $^1\text{H-NMR}$  spectrum of successful post polymerization reaction of  $[\text{PEG}_{27}\text{-}b\text{-PDha}_{41}]_4$  with EOct as modifier (DMSO) B: SEC-traces of post polymerization reaction of  $[\text{PEG}_{27}\text{-}b\text{-PDha}_{41}]_4$  with EOct as modifier (eluent:  $\text{DMSO/LiCl}$  [99.79/0.21], 4-arm star PEG calibration).

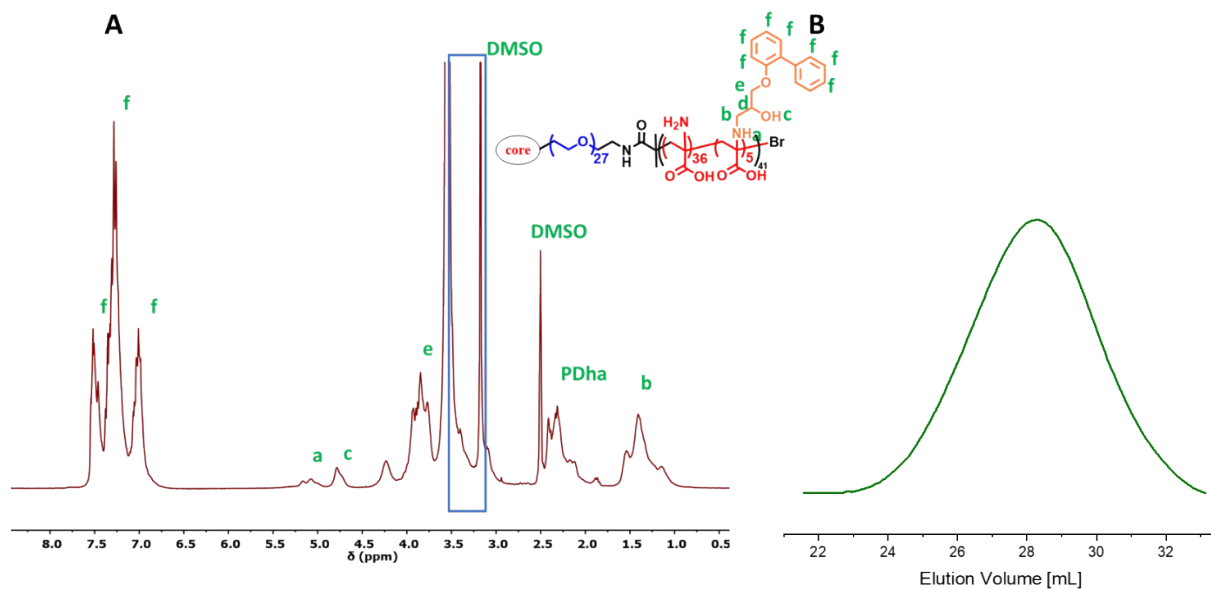

**Figure S6:** Exemplary  $^1\text{H-NMR}$  spectrum of successful post polymerization reaction of  $[\text{PEG}_{27}\text{-}b\text{-PDha}_{41}]_4$  with BpyOM as modifier (DMSO) B: SEC-traces of post polymerization reaction of  $[\text{PEG}_{27}\text{-}b\text{-PDha}_{41}]_4$  with BpyOM as modifier (eluent:  $\text{DMSO/LiCl}$  [99.79/0.21], 4-arm star PEG calibration).

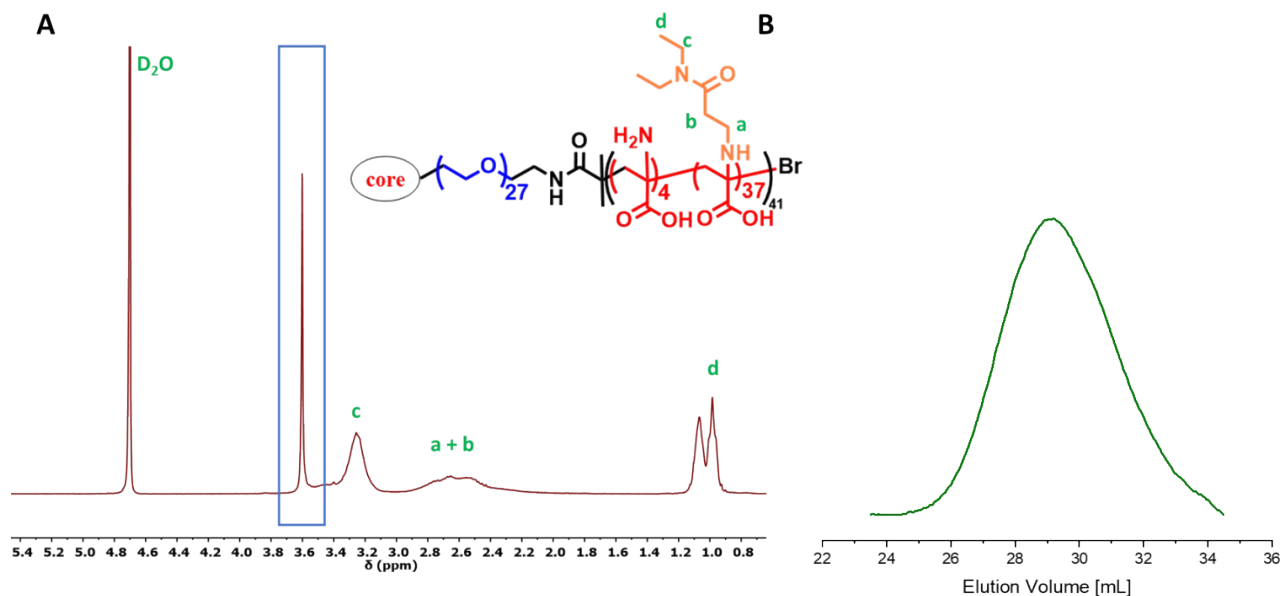

**Figure S7:** Exemplary <sup>1</sup>H-NMR spectrum of successful post polymerization reaction of [PEG<sub>27</sub>-b-PDha<sub>41</sub>]<sub>4</sub> with DEA as modifier (D<sub>2</sub>O) B: SEC-traces of post polymerization reaction of [PEG<sub>27</sub>-b-PDha<sub>41</sub>]<sub>4</sub> with DEA as modifier (eluent: DMSO/LiCl [99.79/0.21], 4-arm star PEG calibration).

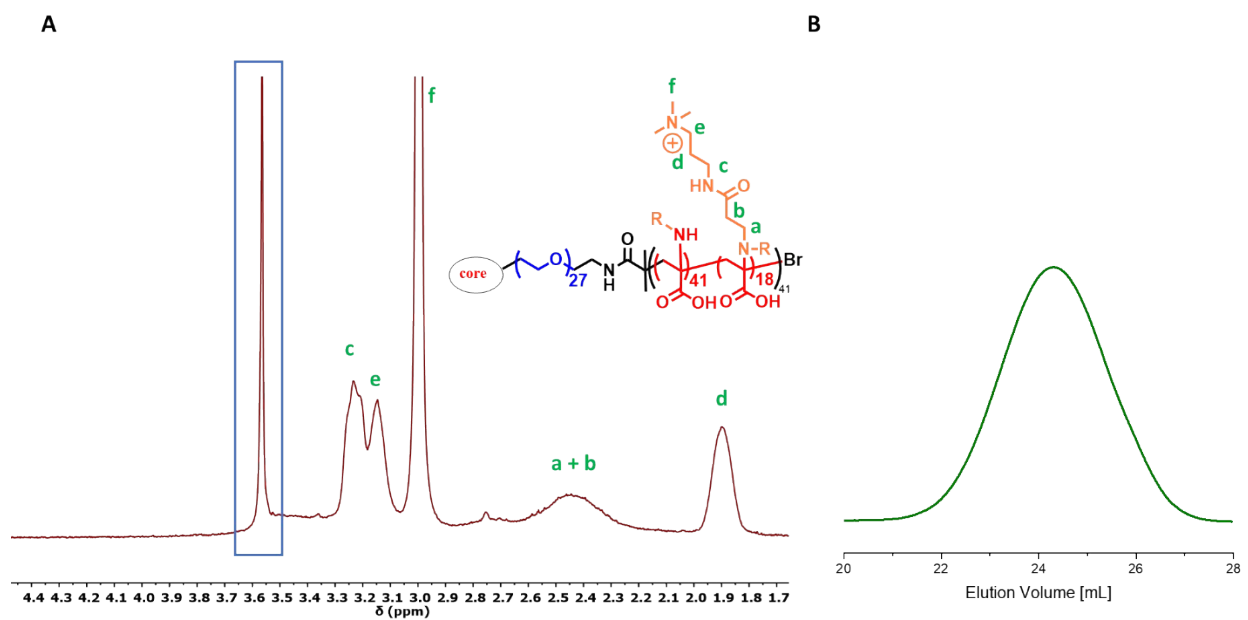

**Figure S8:** Exemplary <sup>1</sup>H-NMR spectrum of successful post polymerization reaction of [PEG<sub>27</sub>-b-PDha<sub>41</sub>]<sub>4</sub> with AMTC as modifier (DMSO) B: SEC-traces of post polymerization reaction of [PEG<sub>27</sub>-b-PDha<sub>41</sub>]<sub>4</sub> with AMTC as (eluent: water and 0.3% TFA/ 0.1 M NaCl [pH < 2], poly(vinyl pyridine) calibration).

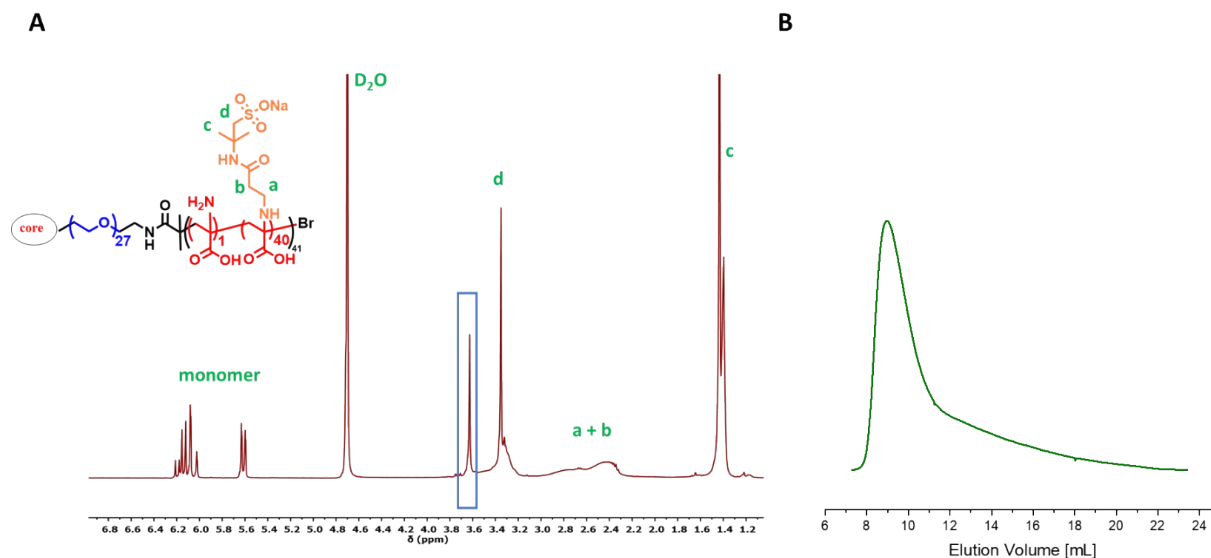

**Figure S9:** Exemplary <sup>1</sup>H-NMR spectrum of successful post polymerization reaction of [PEG<sub>27</sub>-*b*-PDha<sub>41</sub>]<sub>4</sub> with AMPS as modifier (D<sub>2</sub>O) B: SEC-traces of post polymerization reaction of [PEG<sub>27</sub>-*b*-PDha<sub>41</sub>]<sub>4</sub> with AMPS as (eluent: water and 0.3% TFA/ 0.1 M NaCl [pH < 2], poly(vinyl pyridine) calibration).

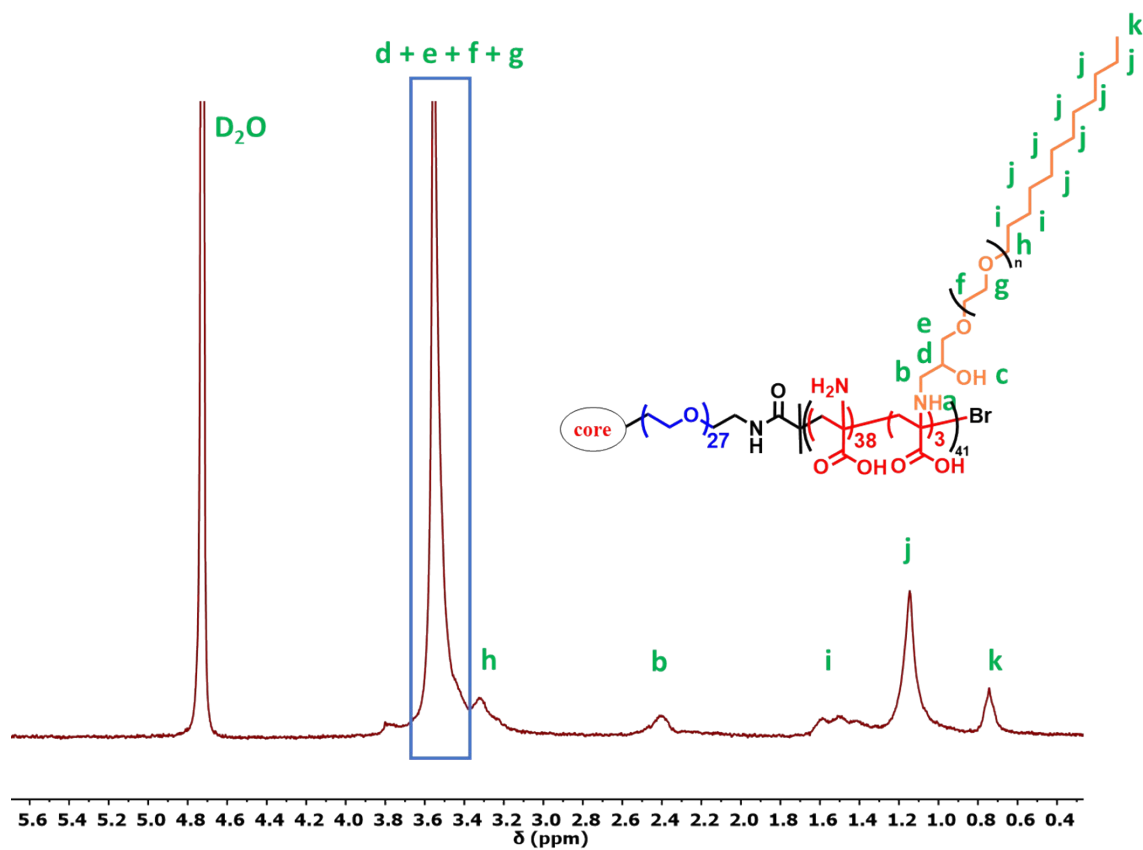

**Figure S10:** A: Exemplary <sup>1</sup>H-NMR spectrum of successful post polymerization reaction of [PEG<sub>27</sub>-*b*-PDha<sub>41</sub>]<sub>4</sub> with PEG-LOM as modifier (D<sub>2</sub>O)



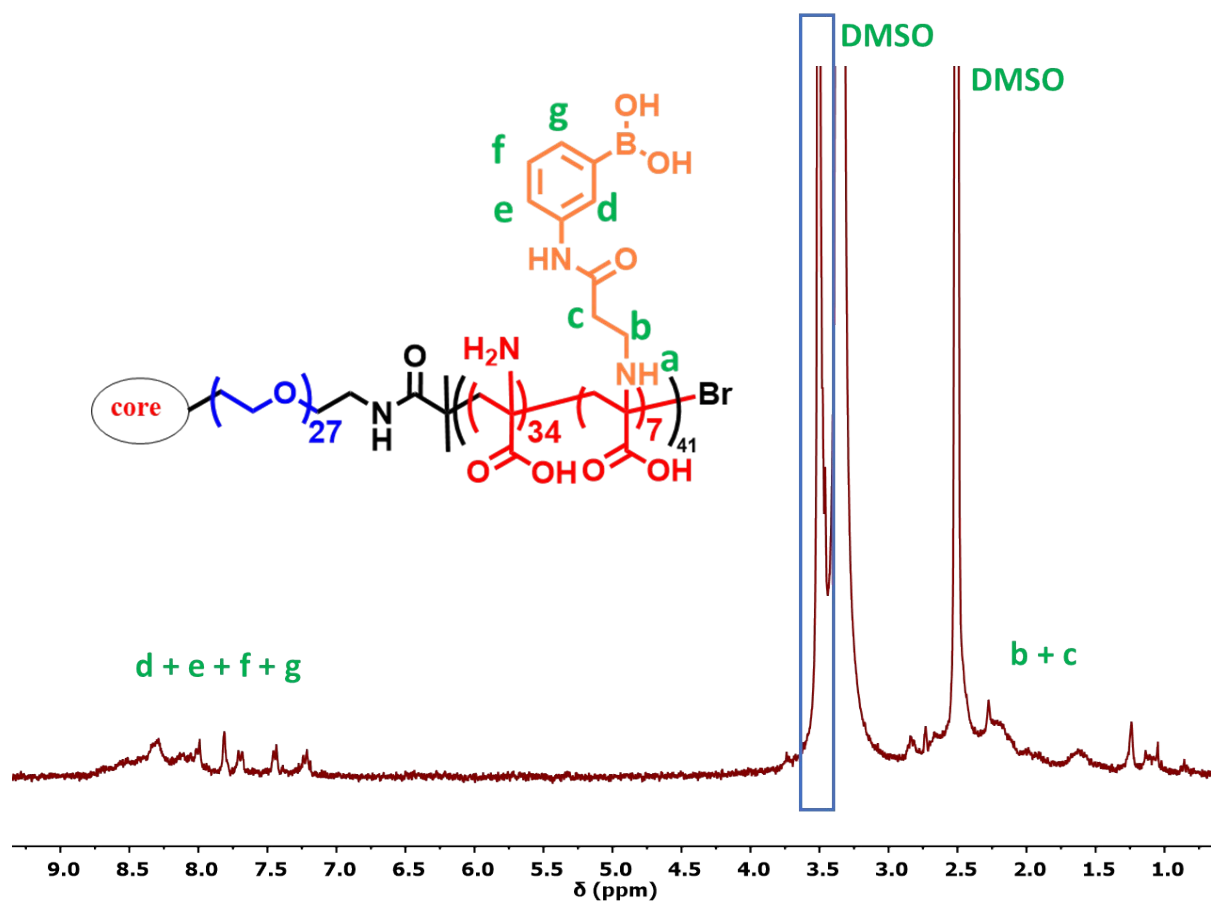

**Figure S11:** Exemplary <sup>1</sup>H-NMR spectrum of successful post polymerization reaction of [PEG<sub>27</sub>-*b*-PDha<sub>41</sub>]<sub>4</sub> with AAPBA as modifier (DMSO).
